# Supplementary material
Source: PubMed Central journal article supplement (PMC7240828)

**The molecular mechanisms underlying the absorption of aglycone and glycosidic flavonoids in a Caco-2 BBe1 cell model**

Hua Zhang<sup>†</sup>, Yousef I. Hassan<sup>†</sup>, Ronghua Liu<sup>†</sup>, Lili Mats<sup>†</sup>, Cheng Yang<sup>‡</sup>, Chunming Liu<sup>§</sup> and  
Rong Tsao<sup>+\*</sup>

<sup>†</sup>Guelph Research & Development Centre, Agriculture and Agri-Food Canada, 93 Stone Road  
West, Guelph, Ontario, Canada, N1G 5C9

<sup>‡</sup>Food Science Department, Jiangnan University, 1800 Lihu Ave, Binhu Qu, Wuxi Shi, Jiangsu  
Province, China

<sup>§</sup>Central Laboratory, Changchun Normal University, No. 677 North Chang-ji Road, 130032  
Changchun, China

**\* Corresponding author.** Tel. +1 226 217 8180; Fax: +1 226 217 8183.  
E-mail address: [Rong.Cao@canada.ca](mailto:Rong.Cao@canada.ca) (R. Tsao).

**(Supporting Information for Publication; Manuscript # ao-2020-0379u)**

**Figure S1.** Expression levels of lactase-phloridzin hydrolase (LPH) in different sections of the entire mouse intestine and Caco-2 BBe1. The relative fold changes were calculated by comparing to LPH expression in mouse colon tissues. Values are presented as mean  $\pm$  SEM, n = 4. Values with a different letter are significantly different at P < 0.05.

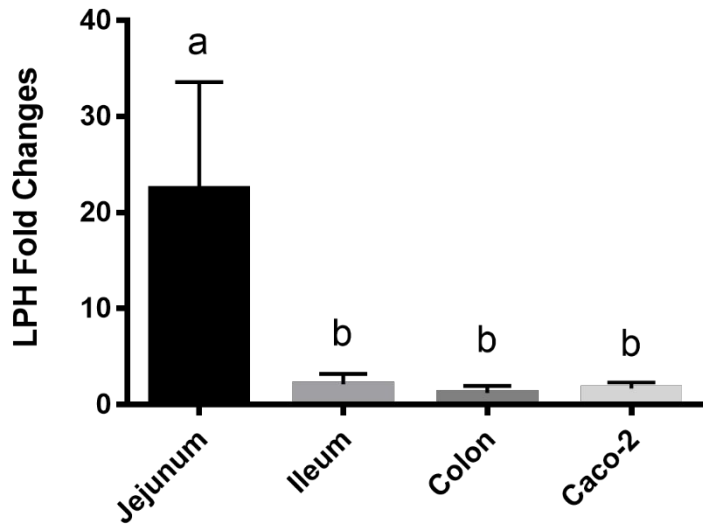

**Figure S2.** 3D structures of flavonoid aglycones and respective mono- and di-glycosides and the two glucose transporters SGLT-1 and GLUT2 studied.

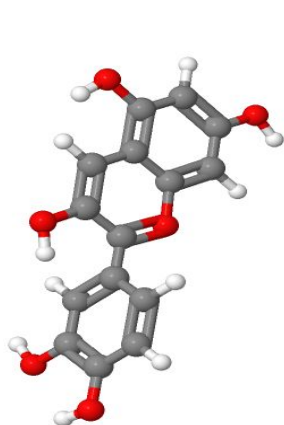

**Cyanidin**

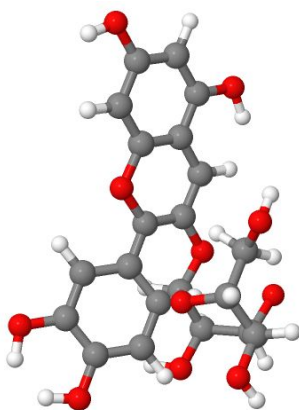

**Cyanidin-3-O-glucoside Quercetin**

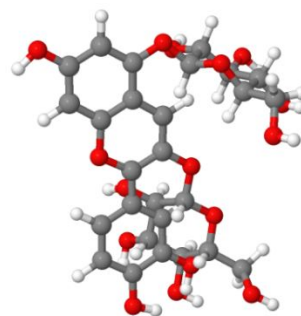

**Cyanin**

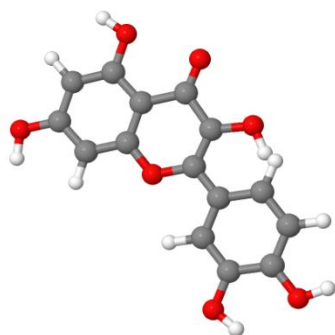

**Quercetin**

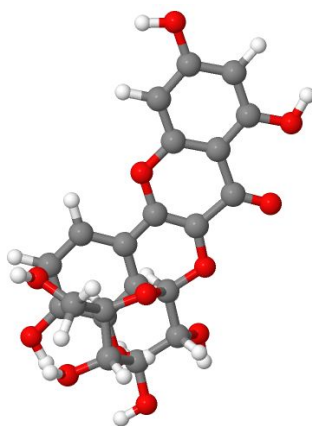

**Quercetin 3-β-D-glucoside**

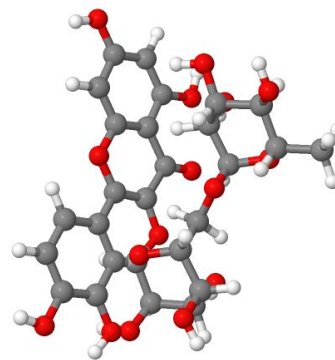

**Rutin**

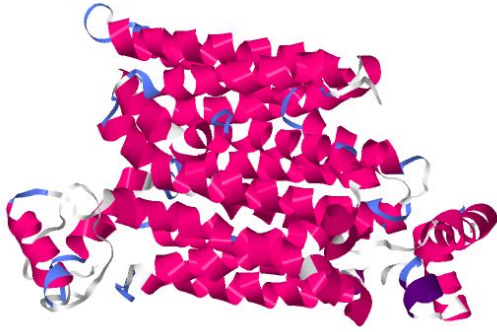

**Glucose Transporter 2 (GLUT2)**

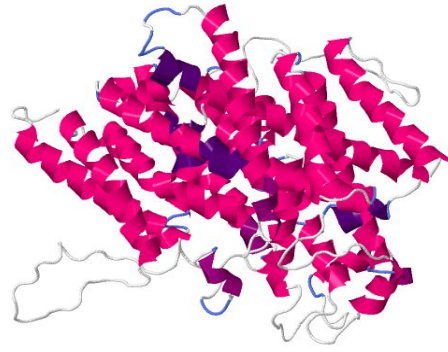

**Sodium/Glucose cotransporter 1 (SGLT1)**

**Figure S3.** Predicted binding/docking sites of the studied flavonoid aglycones and respective mono- and di-glycosides within the SGLT-1 (A) and GLUT2 (B) transporter pockets.

A

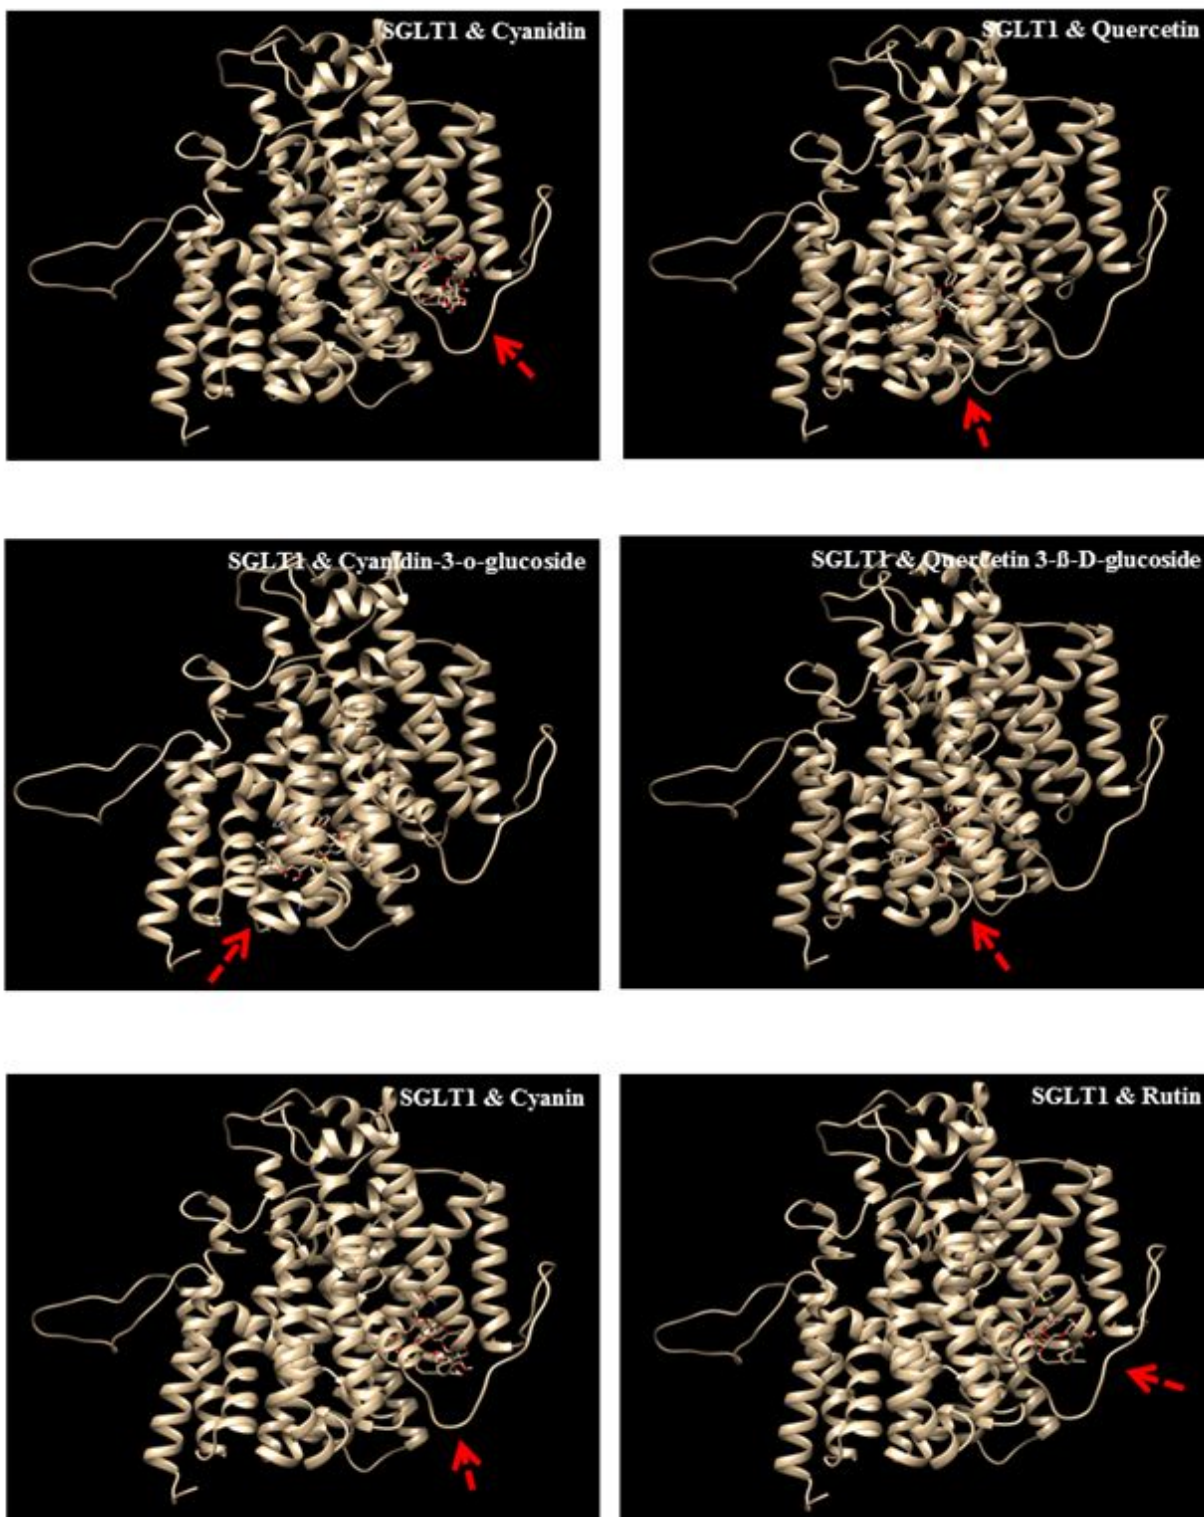

**B**

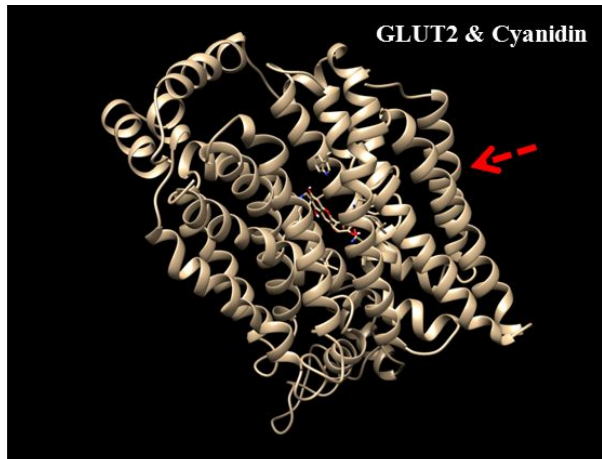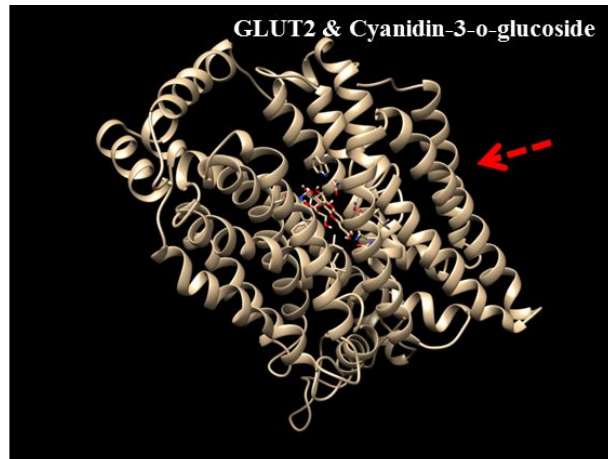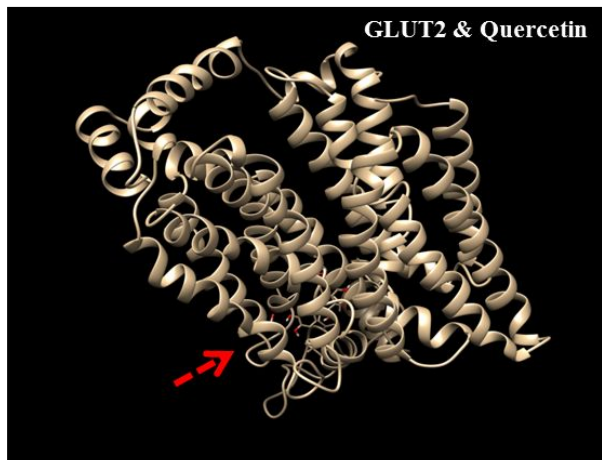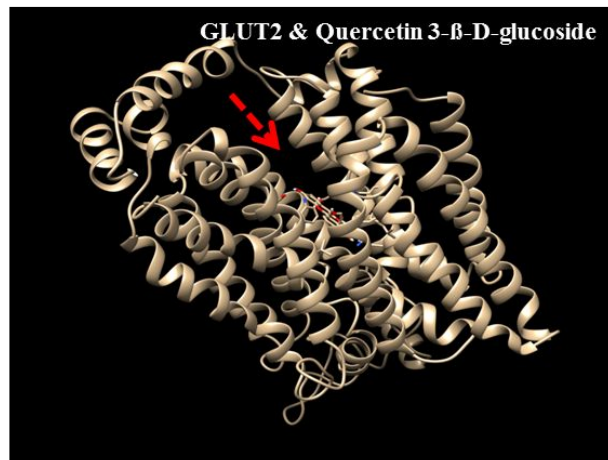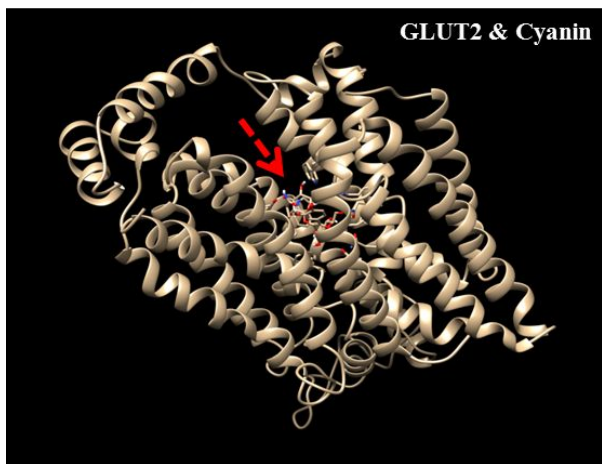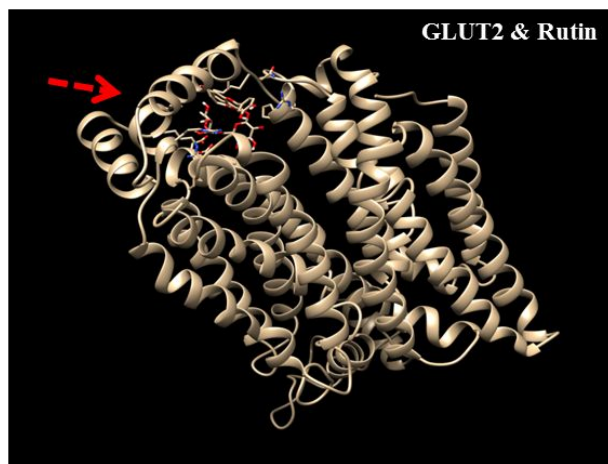

**Figure S4.** Topographic presentation of the di-glycosides. Cyanin (**A**) and rutin (**B**) had totally different atomic rearrangements that establish unique overall affinity and steric hindrances with the binding sites of the transporters.

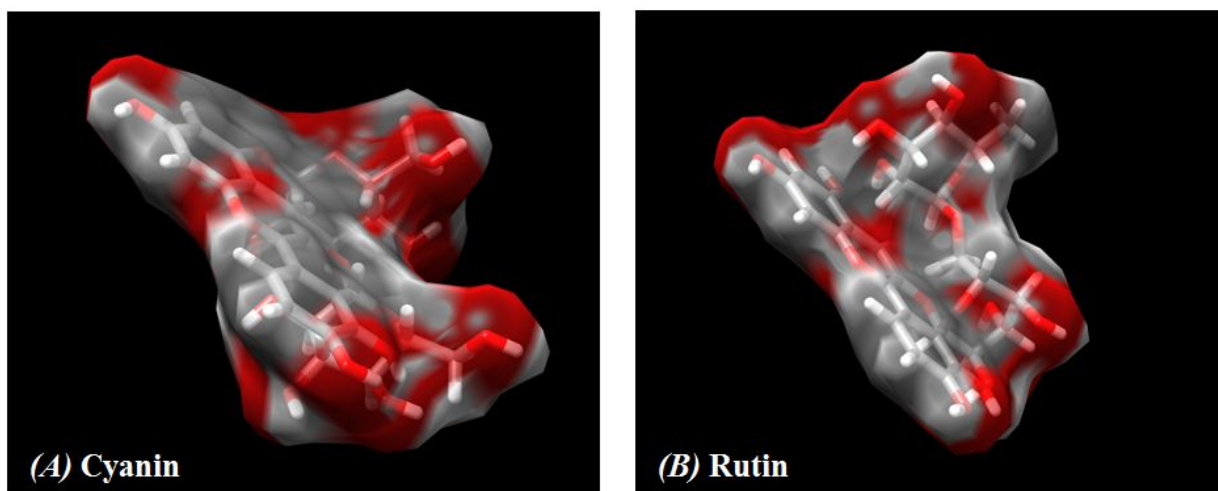

Supplement: ao0c00379_si_001.pdf [file ao0c00379_si_001.pdf]
